# Supplementary material
Source: Springer Nature journal article supplement (https://www.springermedizin.de/resource/supplementary/12889_2009_2004_MOESM1_ESM.pdf/9487284)
Supplement: MOESM1 [file 9487284]

| CHARTI YA MATUMIZI YA DAWA YA AMODIAQUINE |                                                                                                                                                                                                                                                       |                                                                                                                                                                                                                                                       |                                                                                                                                                                     |                |
|-------------------------------------------|-------------------------------------------------------------------------------------------------------------------------------------------------------------------------------------------------------------------------------------------------------|-------------------------------------------------------------------------------------------------------------------------------------------------------------------------------------------------------------------------------------------------------|---------------------------------------------------------------------------------------------------------------------------------------------------------------------|----------------|
| MIAKA                                     | SIKU YA 1                                                                                                                                                                                                                                             | SIKU YA 2                                                                                                                                                                                                                                             | SIKU YA 3                                                                                                                                                           | JUMLA          |
| Chini ya miezi 6                          |                                                                                                                                                                      |                                                                                                                                                                      |                                                                                    | $\frac{3}{4}$  |
| Miezi 6 hadi 11                           |                                                                                                                                                                      |                                                                                                                                                                      |                                                                                    | $1\frac{1}{4}$ |
| Miaka 1 hadi 3                            |                                                                                                                                                                      |                                                                                                                                                                      |                                                                                    | 2              |
| Miaka 4 hadi 5                            |                                                                                                                                                                      |                                                                                                                                                                      |                                                                                    | $2\frac{1}{2}$ |
| Miaka 6 hadi 12                           |                                                                                     |                                                                                     |   | $3\frac{3}{4}$ |
| Miaka 13 hadi 15                          |    |    |   | $6\frac{1}{4}$ |
| Zaidi ya miaka 15                         |    |    |   | $7\frac{1}{2}$ |

Mfano wa majina ya dawa nzuri za kundi la AQ  
Amobin, Camoquin, Diaquin, Malaratab, Uniquin

a

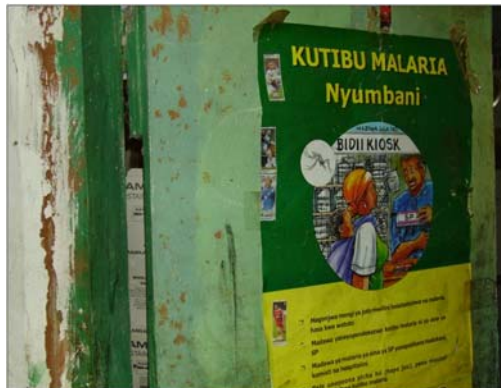

b

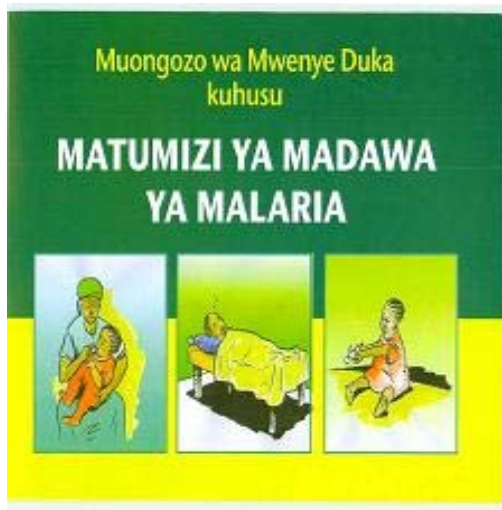

c
